# Supplementary material for: Modification of PLAC8 by UFM1 affects tumorous proliferation and immune response by impacting PD-L1 levels in triple-negative breast cancer
Source: PubMed Central journal article supplement — J Immunother Cancer. 2022 Dec 21;10(12):e005668. doi: 10.1136/jitc-2022-005668 (PMC9772693; doi:10.1136/jitc-2022-005668), 2022-12-21
Supplement: jitc-2022-005668supp003.pdf [file jitc-2022-005668supp003.pdf]

1 Supplementary Figure 1. The expression of PLAC8 in (A) MAD-MB-231 and (B)  
2 HCC-1937 cells transfected with or without PLAC8 shRNAs was explored by  
3 western blot analysis 72 h after transfection and RT-PCR analysis 48 h after  
4 transfection. The expression of UFM1 in (C) MAD-MB-231 and (D) HCC-1937 cells  
5 transfected with or without UFM1 siRNAs was explored by western blot analysis 72 h  
6 after transfection and RT-PCR analysis 48 h after transfection. Data are presented as  
7 the means  $\pm$  SD of three independent experiments. \* $p < 0.05$ ; \*\* $p < 0.01$ ; ns, not  
8 significant.

9 Supplementary Figure 2. (A) and (B) Clonogenic survival assays were performed. (C)  
10 and (D) PD-L1 mRNA expression in TNBC and non-TNBC samples in the TCGA  
11 breast and TCGA breast 2 databases. (E) The relative levels of PD-L1 mRNA in the  
12 GSE65194 database. (F) RT-PCR analysis of PLAC8 and PD-L1 mRNA in  
13 MDA-MB-231 and HCC-1937 cells with PLAC8 depletion 48 h after transfection. (G)  
14 PLAC8 and PD-L1 protein expression in stable PLAC8 knockdown cells treated with  
15 or without IFN- $\gamma$  was detected by western blot. Data are presented as the means  $\pm$  SD  
16 of three independent experiments. \* $p < 0.05$ ; \*\* $p < 0.01$ ; ns, not significant.
