# Supplementary figures and images for: Modification of PLAC8 by UFM1 affects tumorous proliferation and immune response by impacting PD-L1 levels in triple-negative breast cancer
Source: PubMed Central journal article supplement — J Immunother Cancer. 2022 Dec 21;10(12):e005668. doi: 10.1136/jitc-2022-005668 (PMC9772693; doi:10.1136/jitc-2022-005668), 2022-12-21

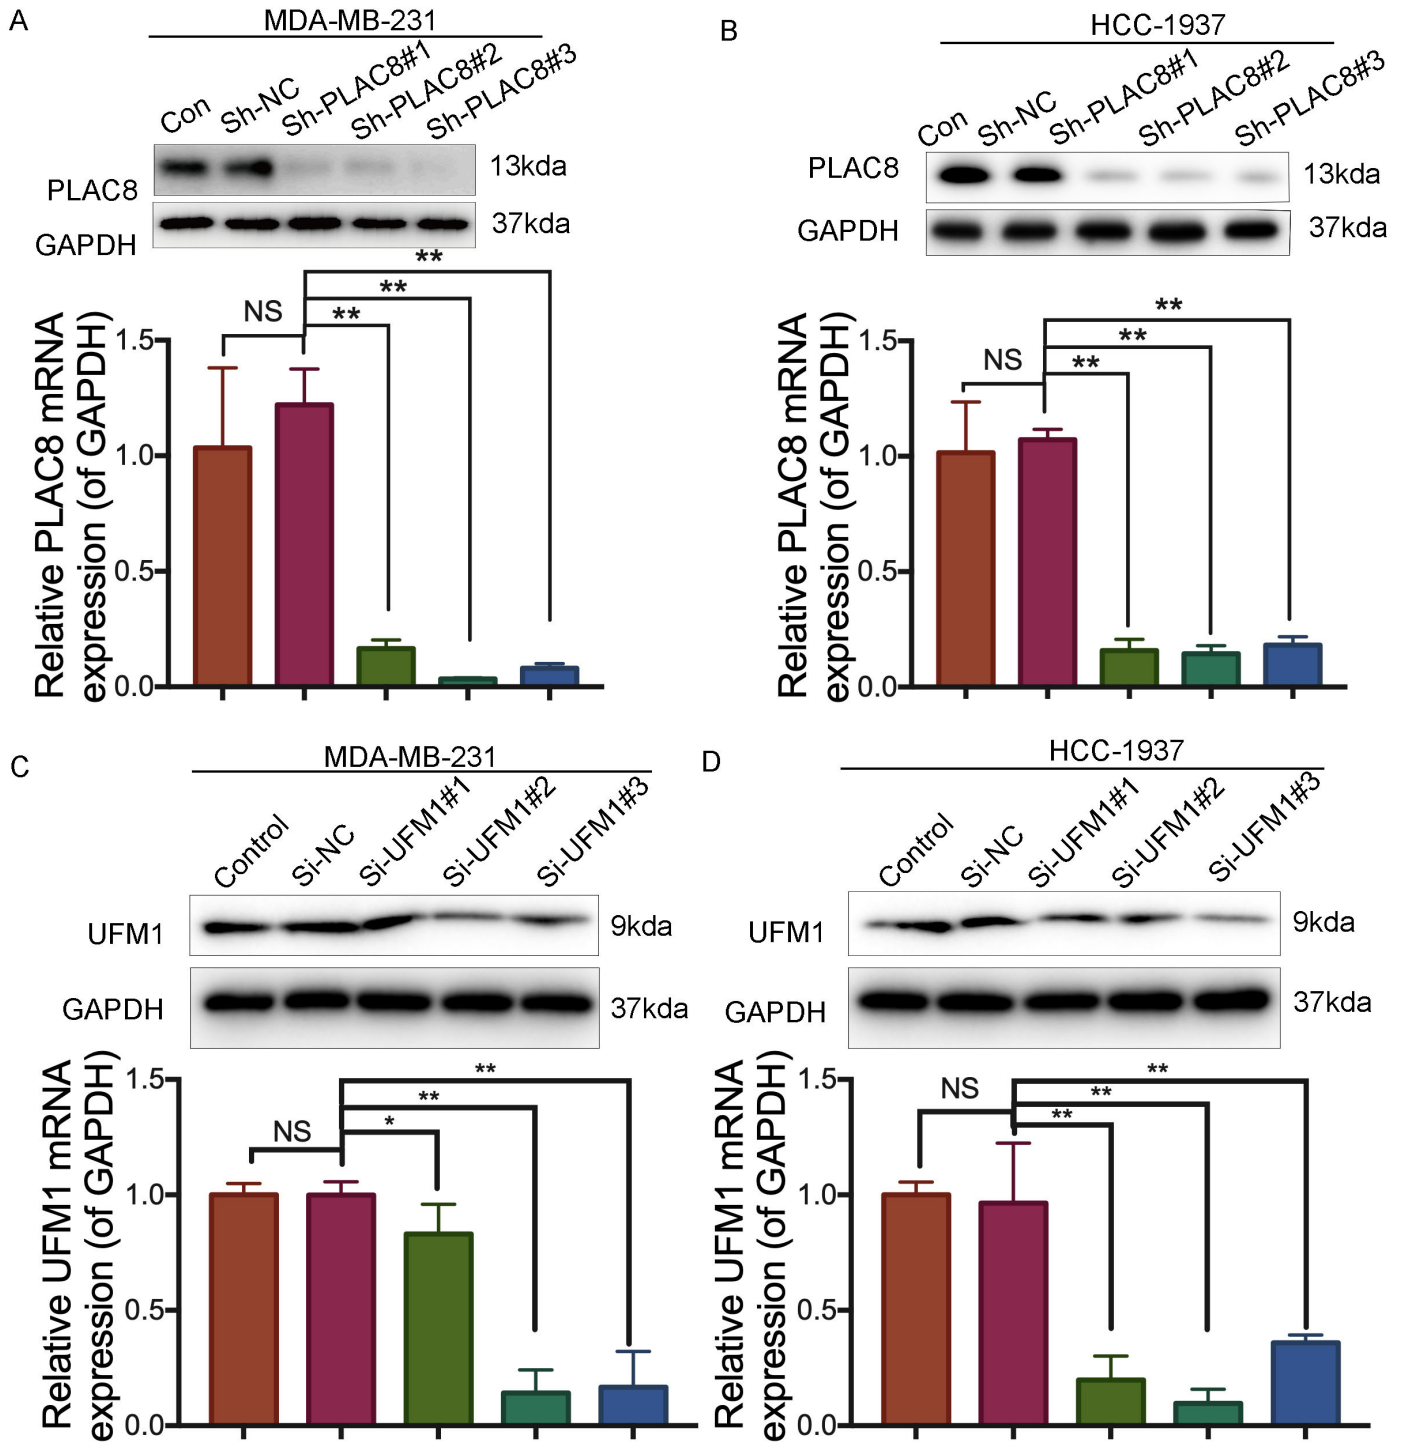

Supplement: jitc-2022-005668supp001.pdf [file jitc-2022-005668supp001.pdf]

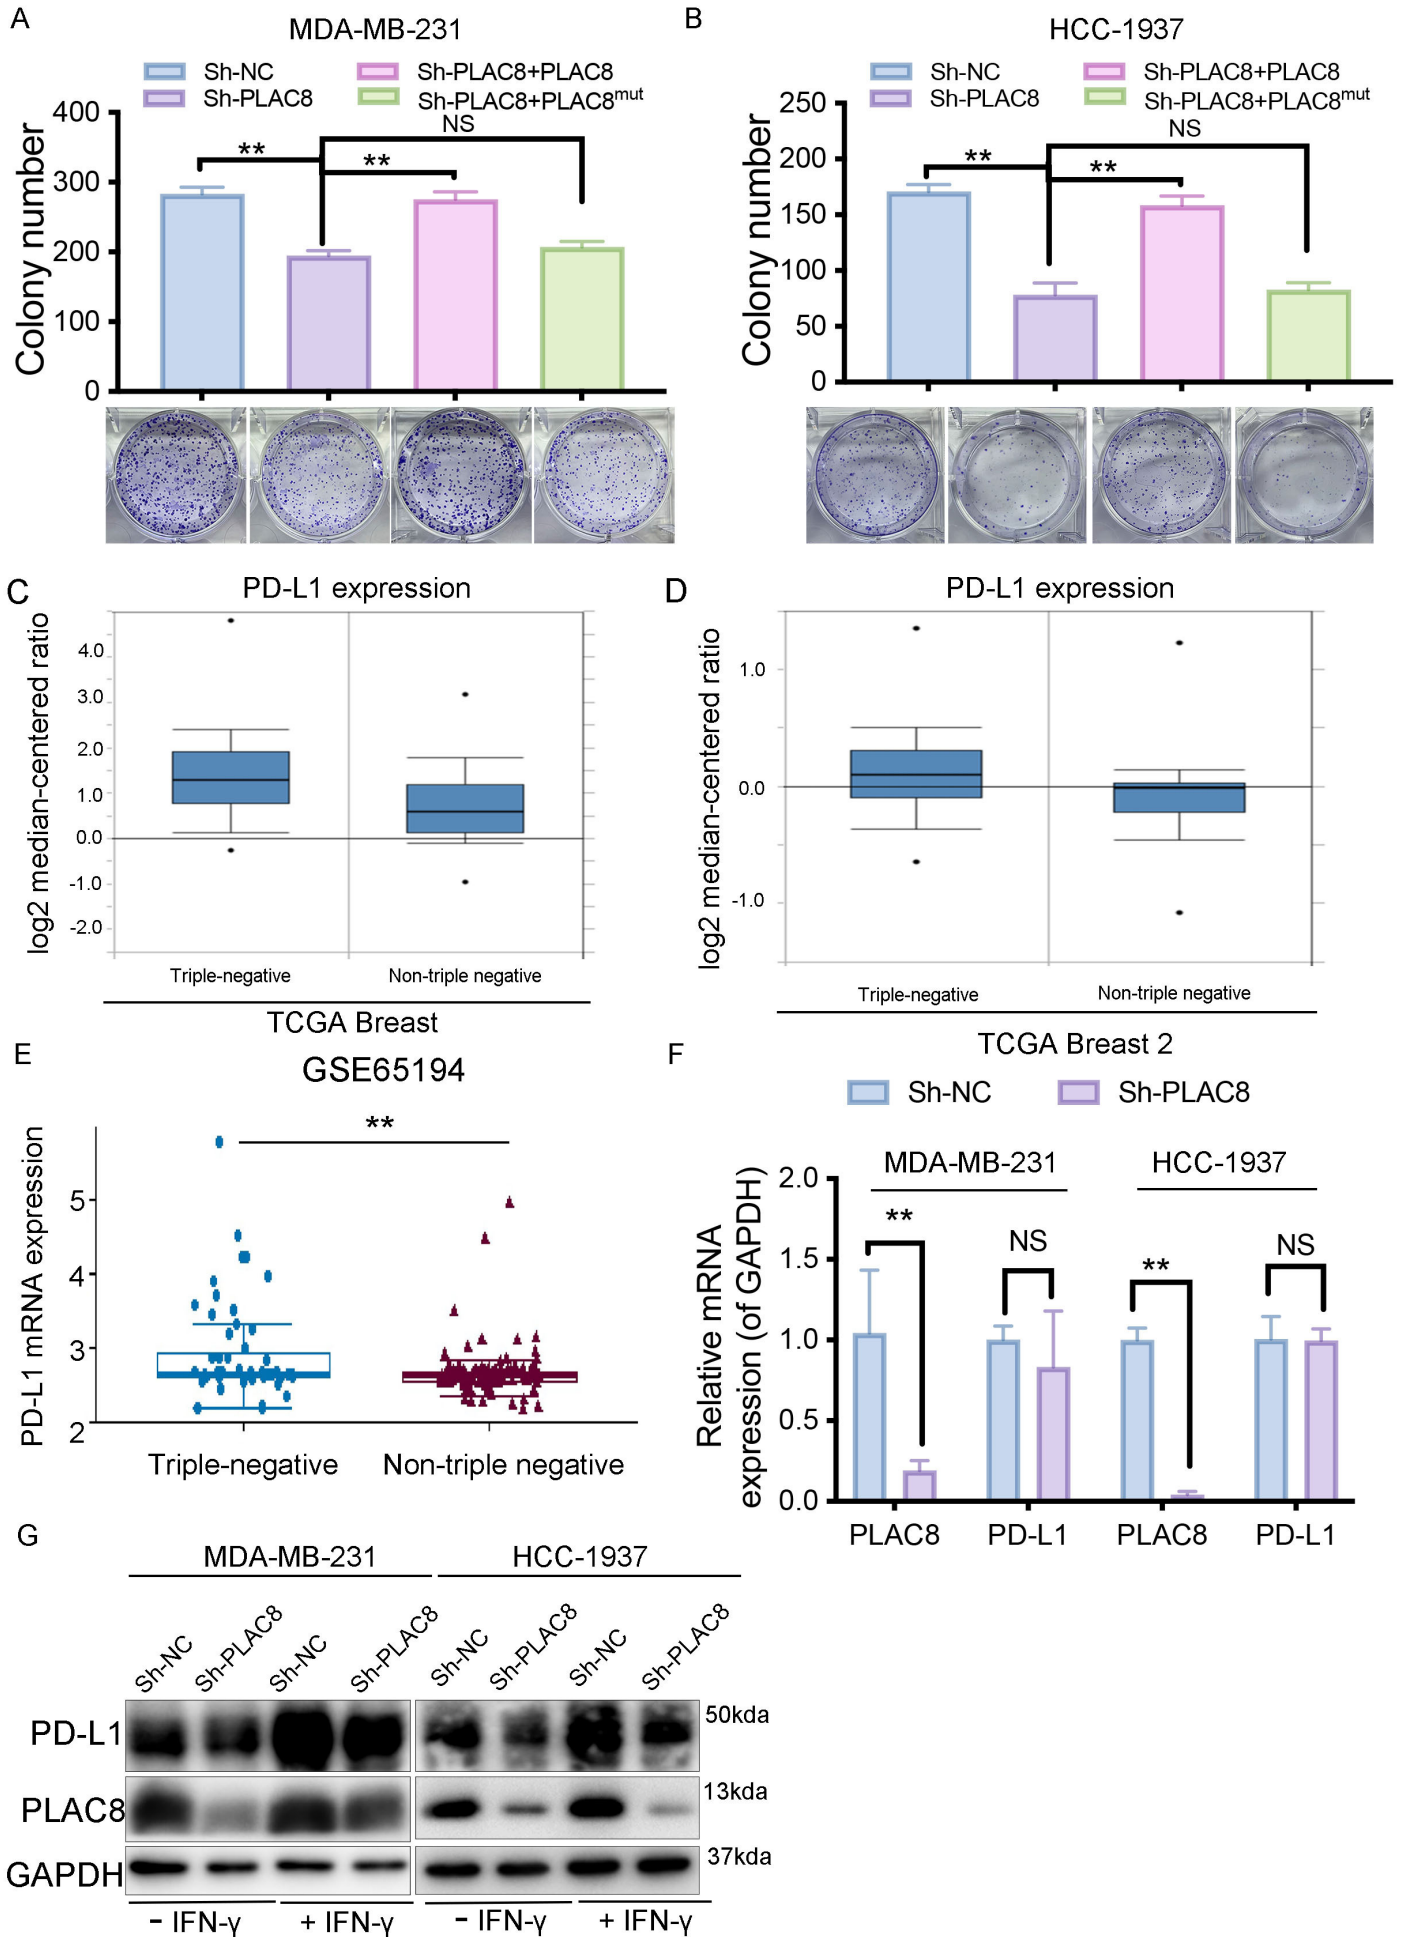

Supplement: jitc-2022-005668supp002.pdf [file jitc-2022-005668supp002.pdf]
